# Supplementary material for: Synthesis and Biological Evaluation of Novel Selenyl and Sulfur-l-Dopa Derivatives as Potential Anti-Parkinson’s Disease Agents
Source: PubMed Central journal article supplement (PMC6628379; doi:10.3390/biom9060239), 2019-06-18
Supplement: biomolecules-09-00239-s001.pdf [file biomolecules-09-00239-s001.pdf]

Article

# Synthesis and biological evaluation of novel selenyl- and sulfur-L-Dopa derivatives as potential anti-Parkinson compounds

Antonio Di Stefano <sup>1</sup>, Lisa Marinelli<sup>1</sup>, Piera Eusepi<sup>1</sup>, Michele Ciulla<sup>1</sup>, Stefania Fulle<sup>2</sup>, Ester Sara Di Filippo<sup>2</sup>, Laura Magliulo<sup>2</sup>, Giuseppe Di Biase<sup>1</sup>, and Ivana Cacciatore<sup>1,\*</sup>

<sup>1</sup> Department of Pharmacy, University "G. d'Annunzio" Chieti-Pescara, Chieti, Italy

<sup>2</sup> Department of Neuroscience, Imaging and Clinical Sciences, University "G. d'Annunzio" Chieti-Pescara, Chieti, Italy

\* Correspondence: ivana.cacciatore@unich.it; Tel.: +39-0871-355-4475

## Supplementary material

<sup>1</sup>H-, <sup>13</sup>C-NMR and MS spectra of SP1

<sup>1</sup>H-, <sup>13</sup>C-NMR and MS spectra of SP2

<sup>1</sup>H-, <sup>13</sup>C-NMR and MS spectra of SP3

<sup>1</sup>H-, <sup>13</sup>C-NMR and MS spectra of SP4

<sup>1</sup>H-, <sup>13</sup>C-NMR and MS spectra of SP5

<sup>1</sup>H-, <sup>13</sup>C-NMR and MS spectra of SP6

MTT assay for SP1–5

Antioxidant test for SP1–5

SPT

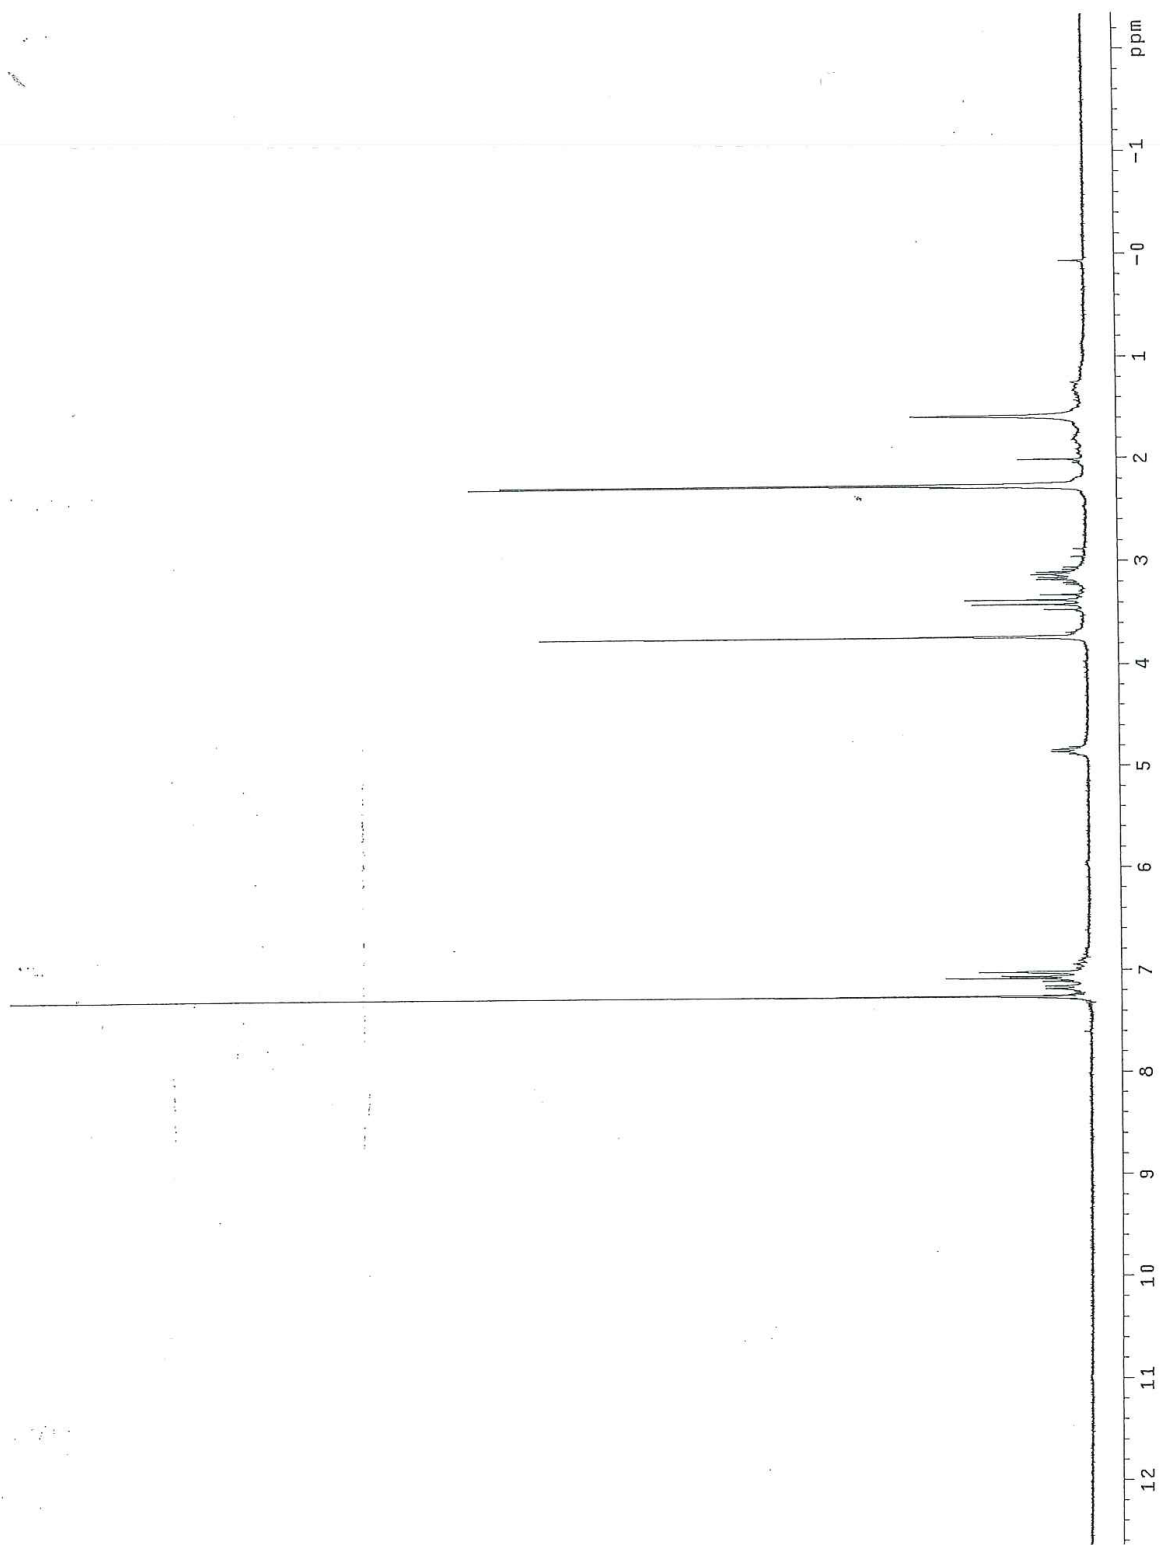

1

SP1

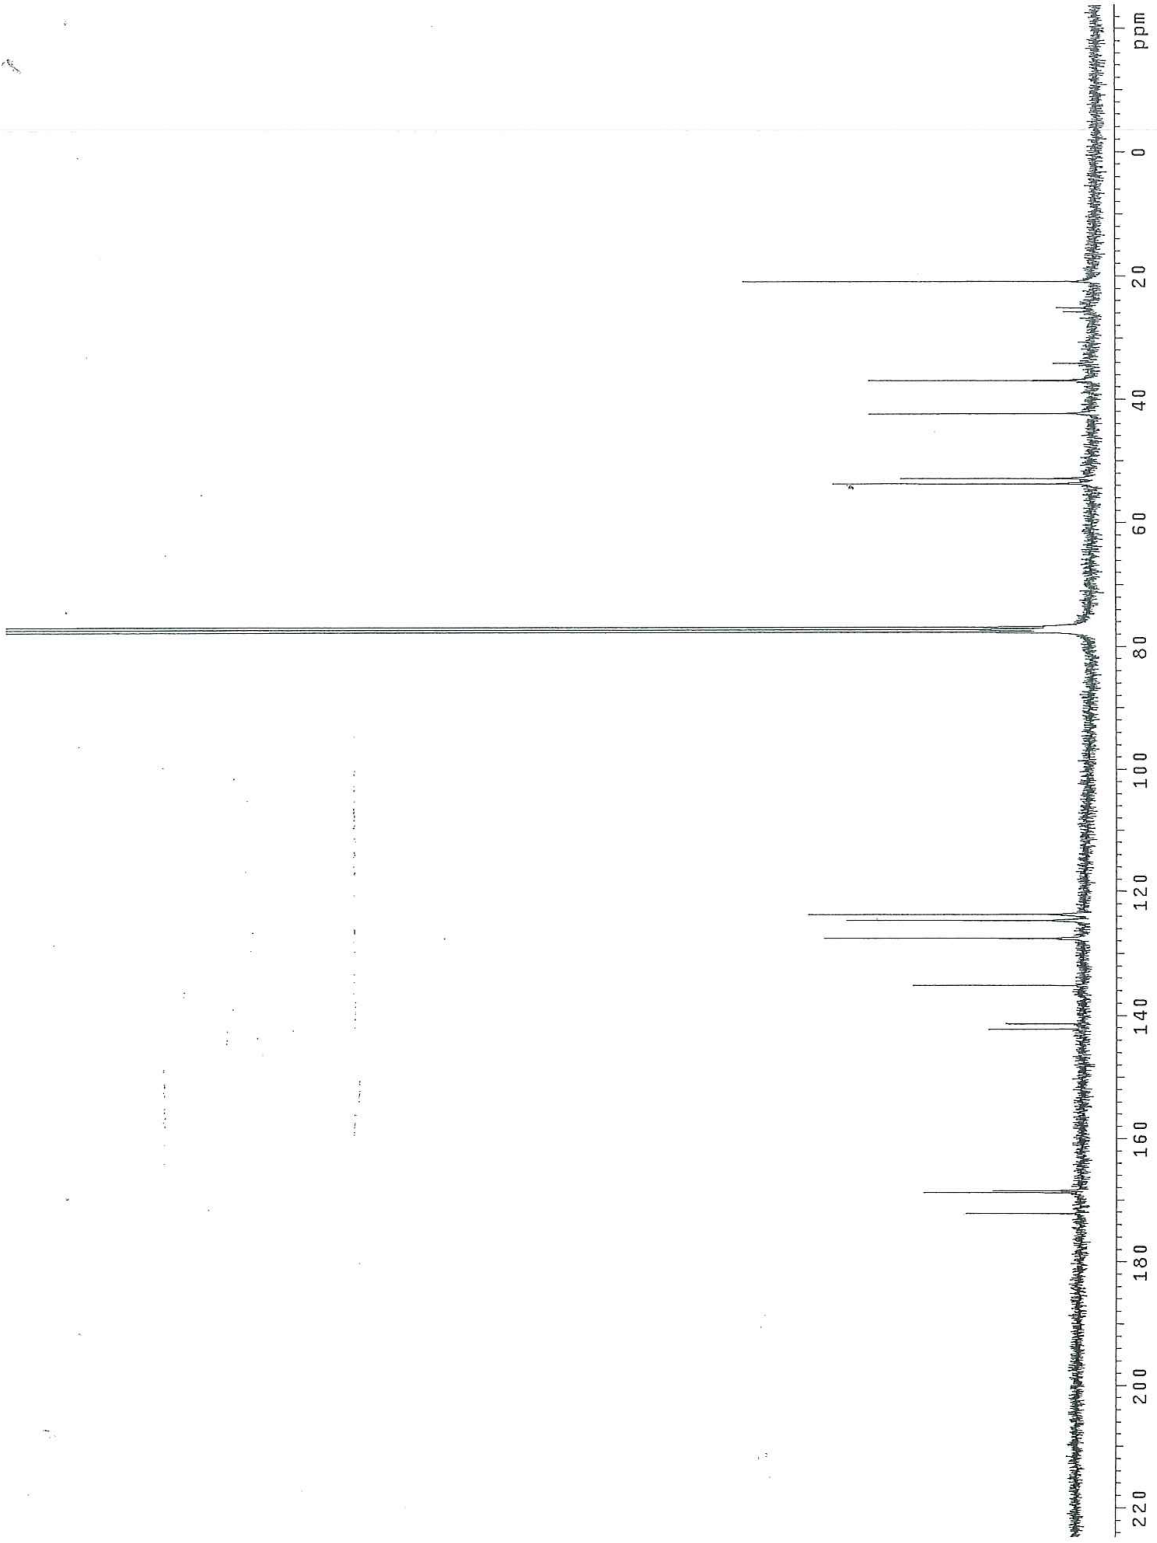

SP1 #58 RT: 1.90 AV: 1 NL: 2.97E6  
T: + c ESI Full.ms [100.00-2000.00]

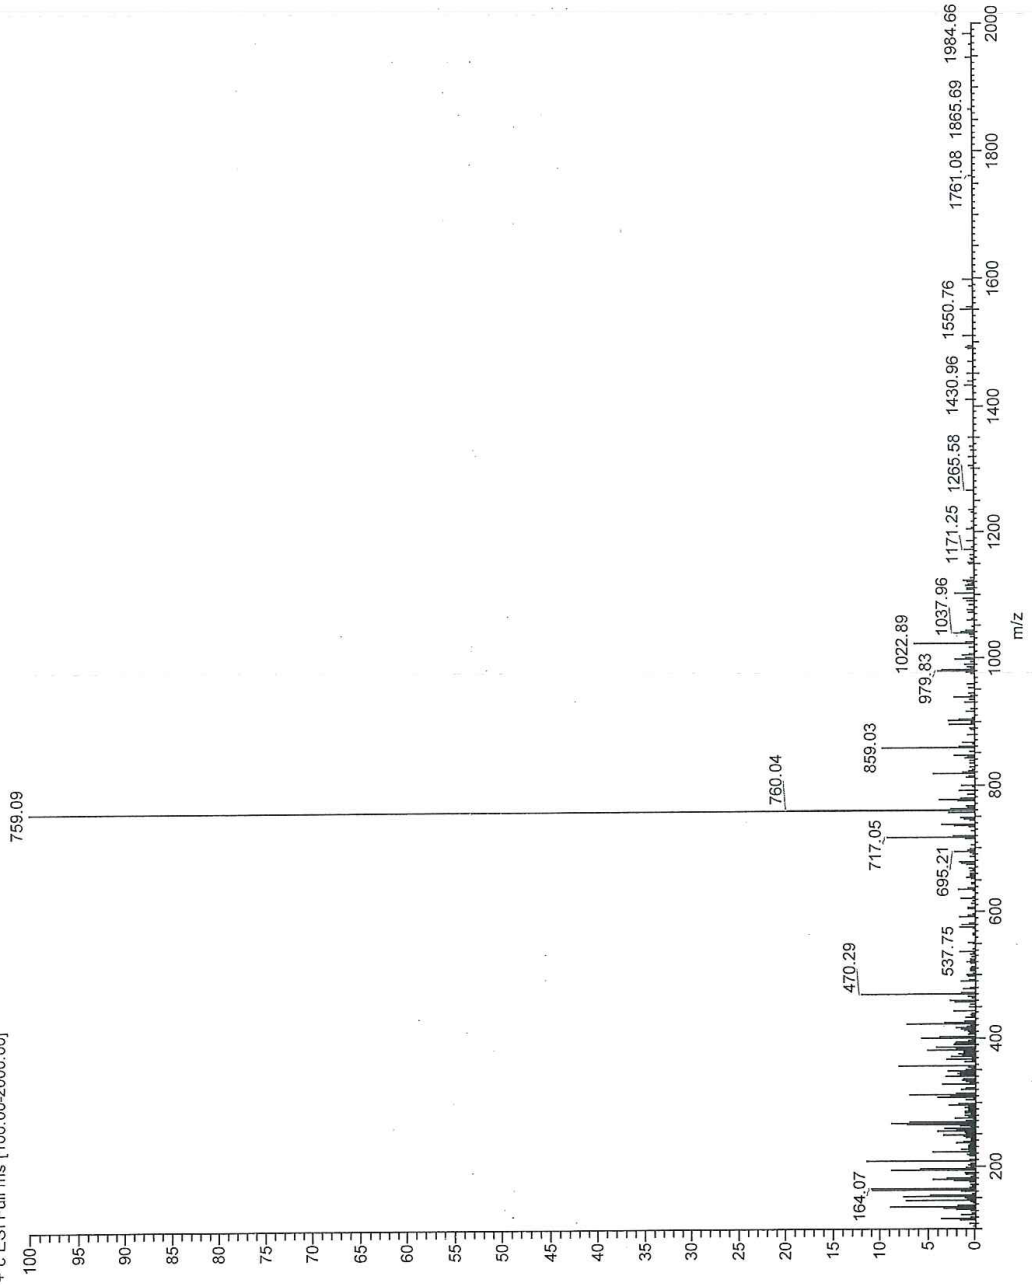

$^1\text{H-NMR}$  ( $\text{CDCl}_3$ )

SP2

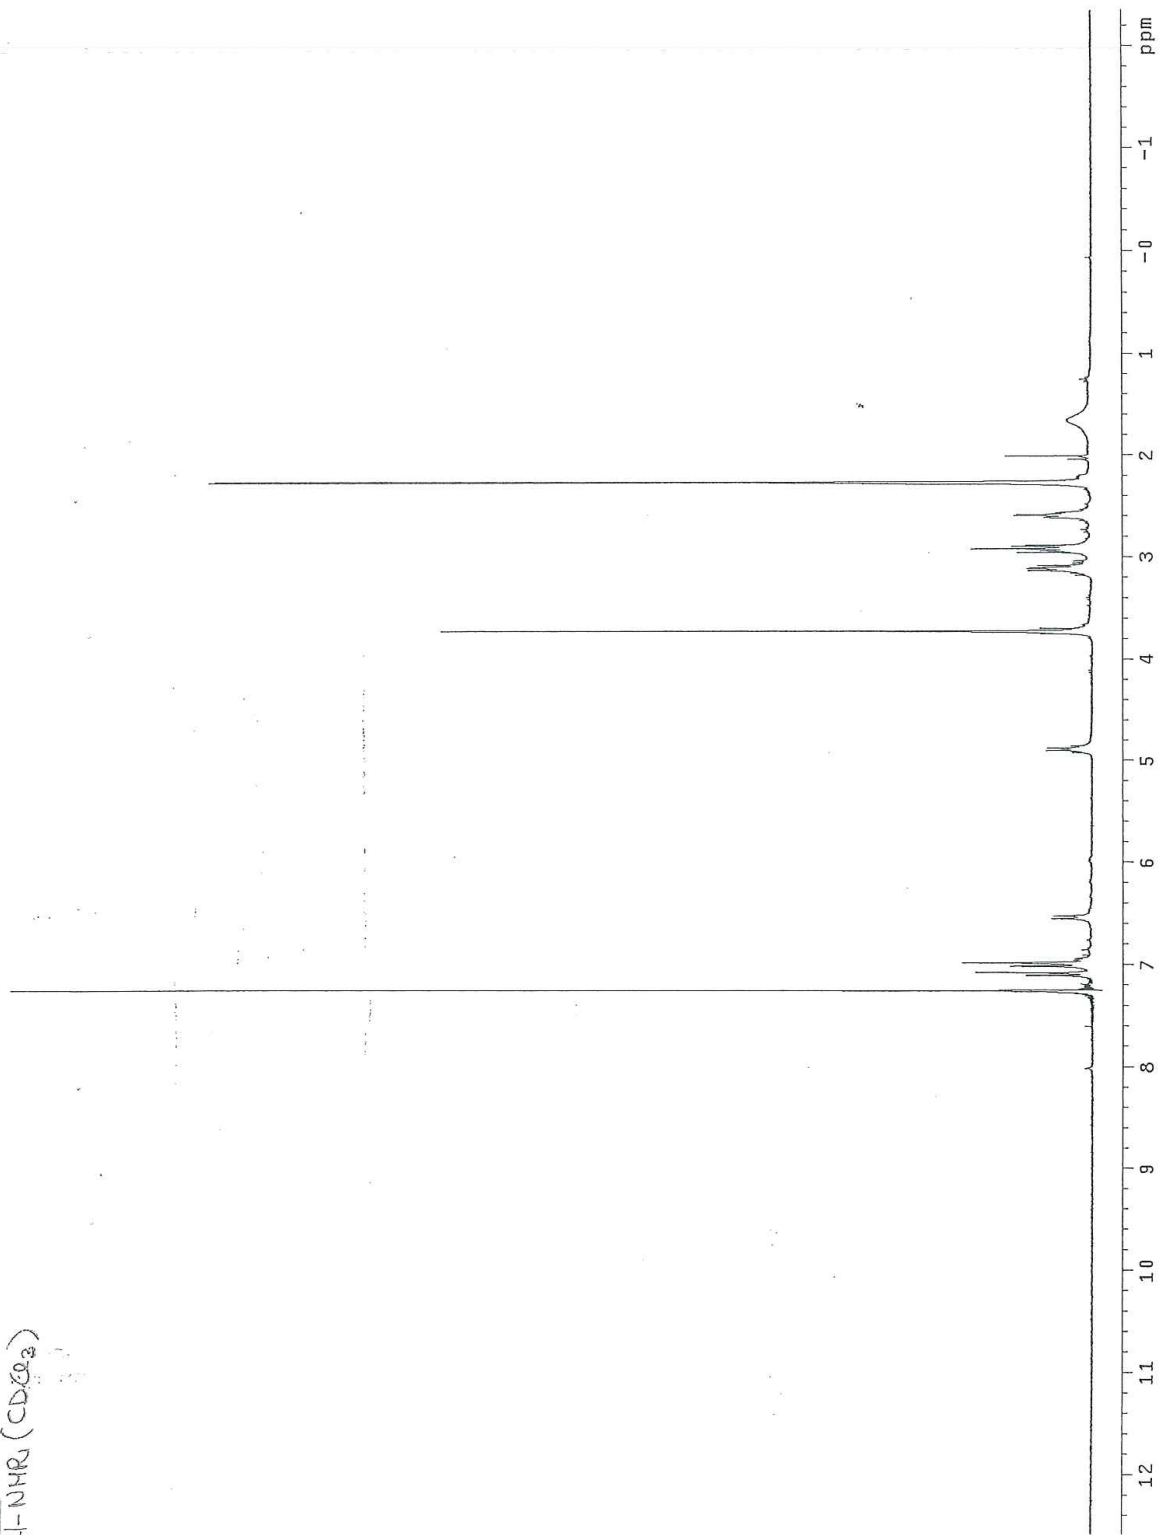

SP2

13C OBSERVE

exp1 std13c

SAMPLE DEC. & VT  
date Nov 28 2007 dfrq 300.199  
solvent CDCl3 dn H1  
files exp 41 H1  
ACQUISITION exp 0  
sfreq 75.482 dm YYY  
tn 1.815 dnm W  
at 68108 dnr 11400  
np 18761.7 lb PROCESSING 1.00  
fb 10400 wtfile  
bs 16 proc ft  
tpwr 62 fn not used  
pw 8.7 werr 0  
tq 0 wexp 0  
nt 1e+08 wps 0  
ct 35266 wnt  
alock s  
gain not used  
FLAGS  
ll n  
ln n  
in y  
dp  
DISPLAY  
sp -1804.1  
wp 18781.7  
vs 217  
sc 0  
wc 250  
hzmm 20.12  
ls 500.00  
rfi 1804.1  
tpp 0  
tpr 64  
ins  
nm no ph 100.000

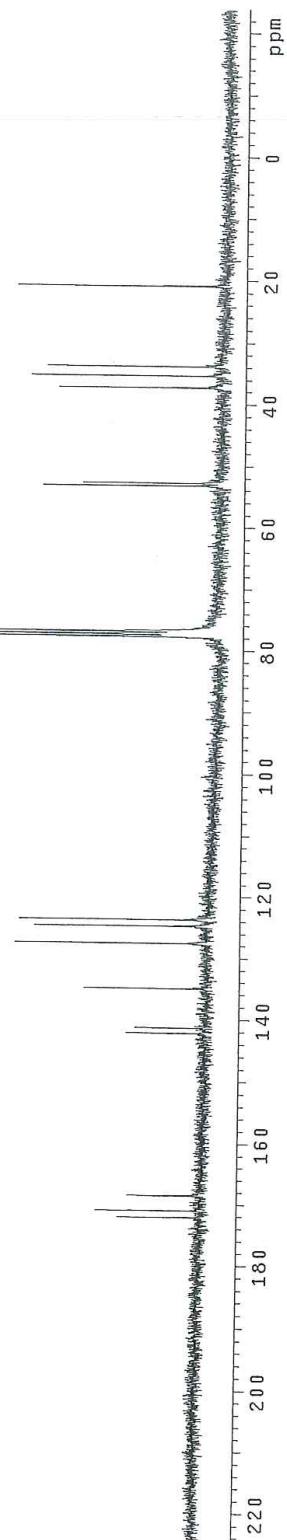

SP2 #127 RT: 4.23 AV: 1 NL: 1.06E6  
T: + c ESI Full ms [100.00-2000.00]

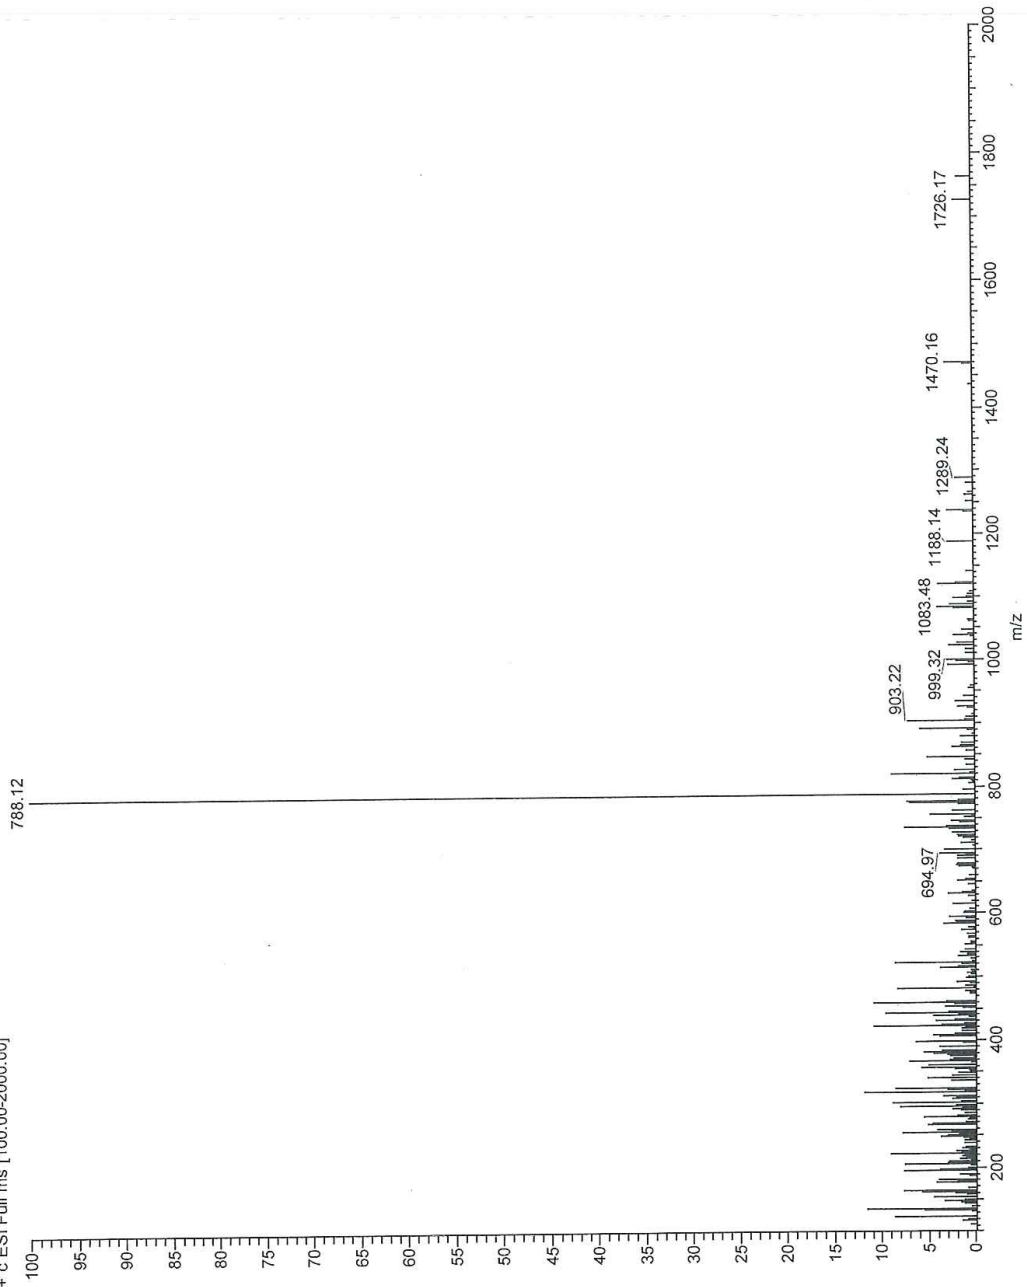

1-NMR (CDCl<sub>3</sub>)

SF3

STANDARD 1H OBSERVE

```
exp1 std1h      DEC. & VT
SAMPLE          dfrq 300.059
date Mar 28 2007
solvent CDCl3
file CDC13
ACQUISITION    exp 41
sfrq 300.059    dm 0
tn H1           dnm nnn
at 1.998        dmf 11400
np 17984        wtrfile
sw 4500.5       proc
fb 2600         fn
bs 16           not used
tpwr 57         wpr
pw 7.000        wexp
to 1.000        wbs
tof 32          wnt
nt 32
ct
alock
gain 20
FLAGS          n
ii             n
in             n
dp             y
SP DISPLAY    -804.1
WD            4500.5
VS            214
SC            0
WC            250
h2mm         18.00
ls            823.53
rfi           504.0
t1p           20
t1s           1.000
nm cdc ph
```

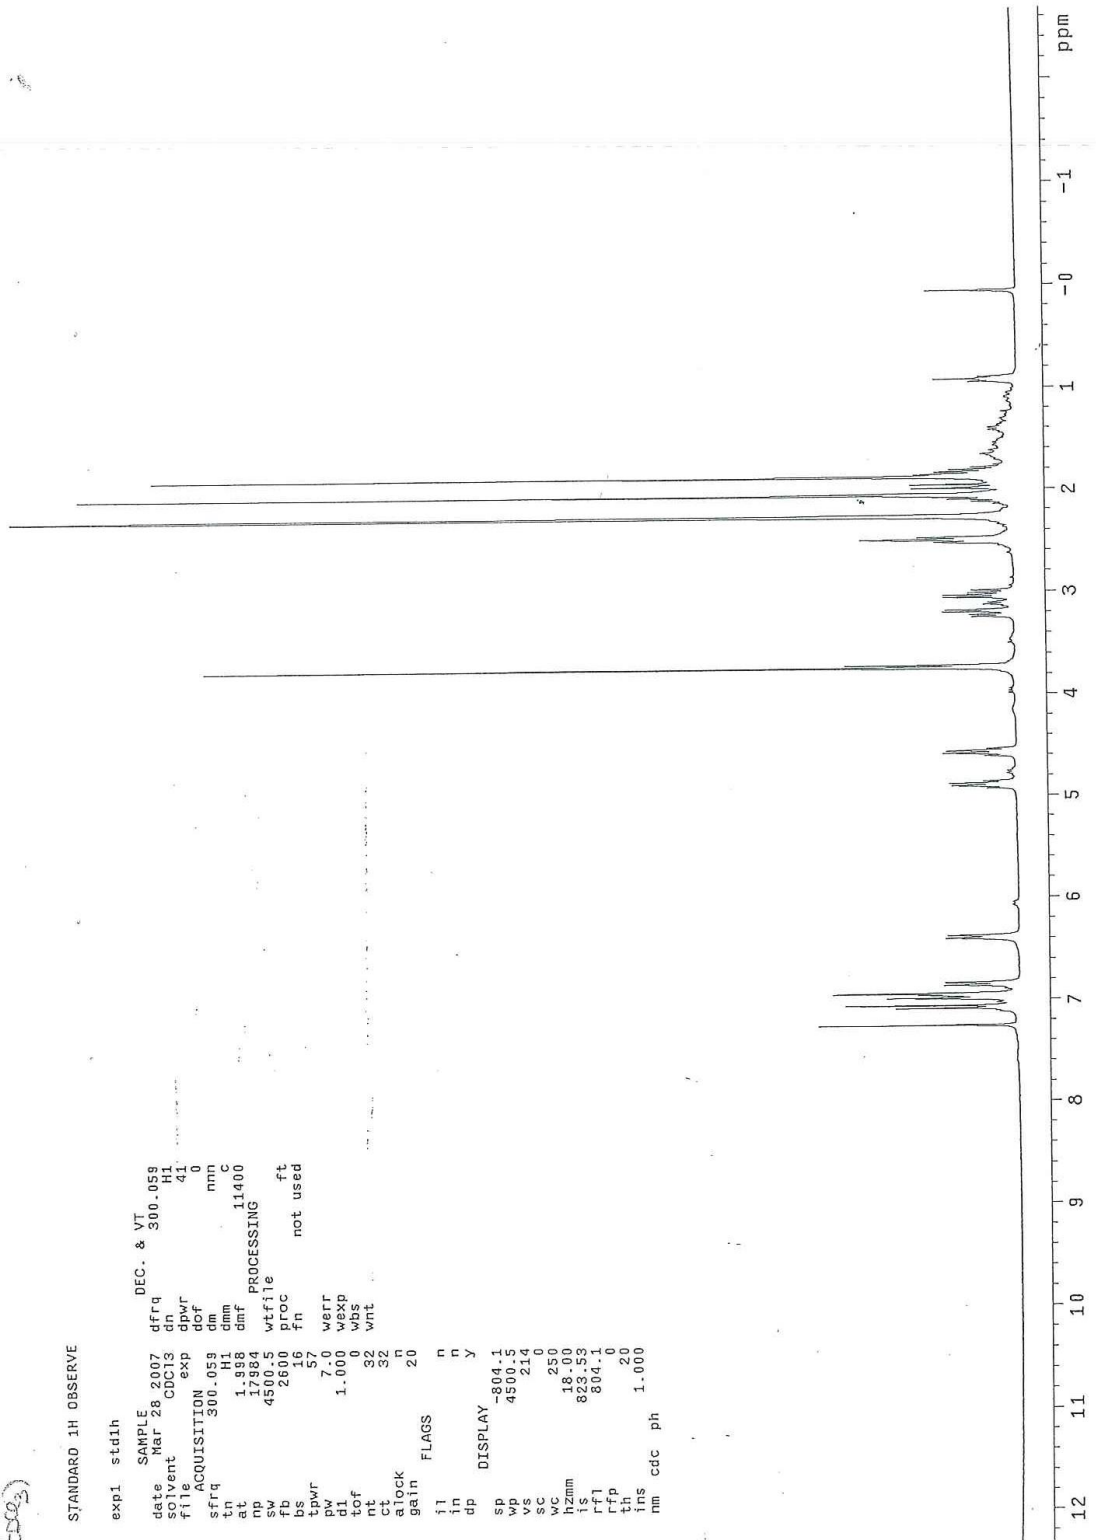



503

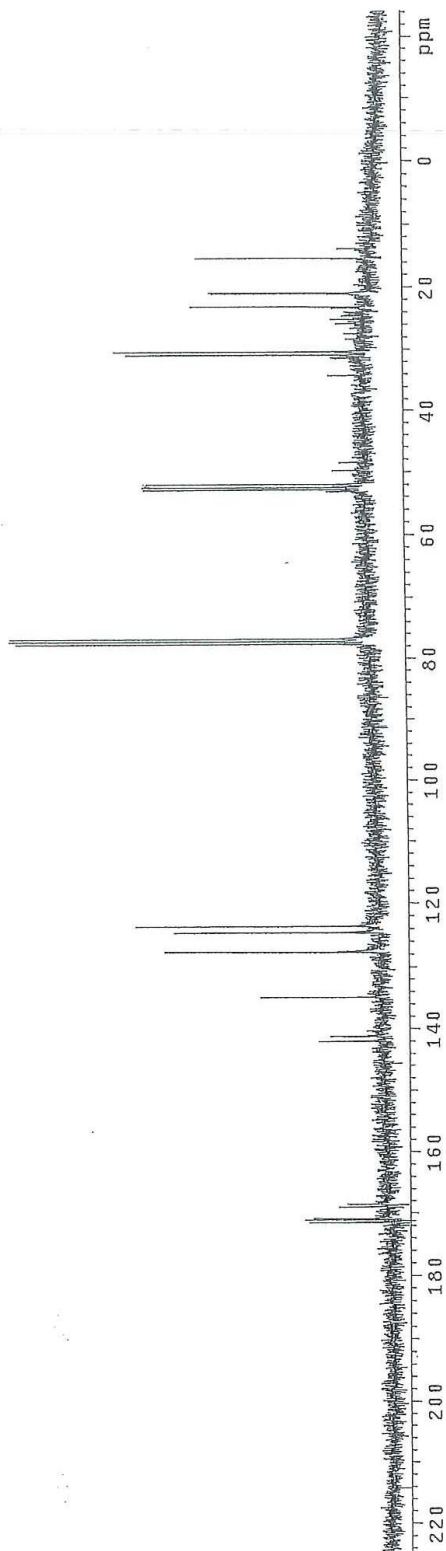

SP3#105 RT: 3.47 AV: 1 NL: 1.44E6  
T: + c ESI Full ms [100.00-2000.00]

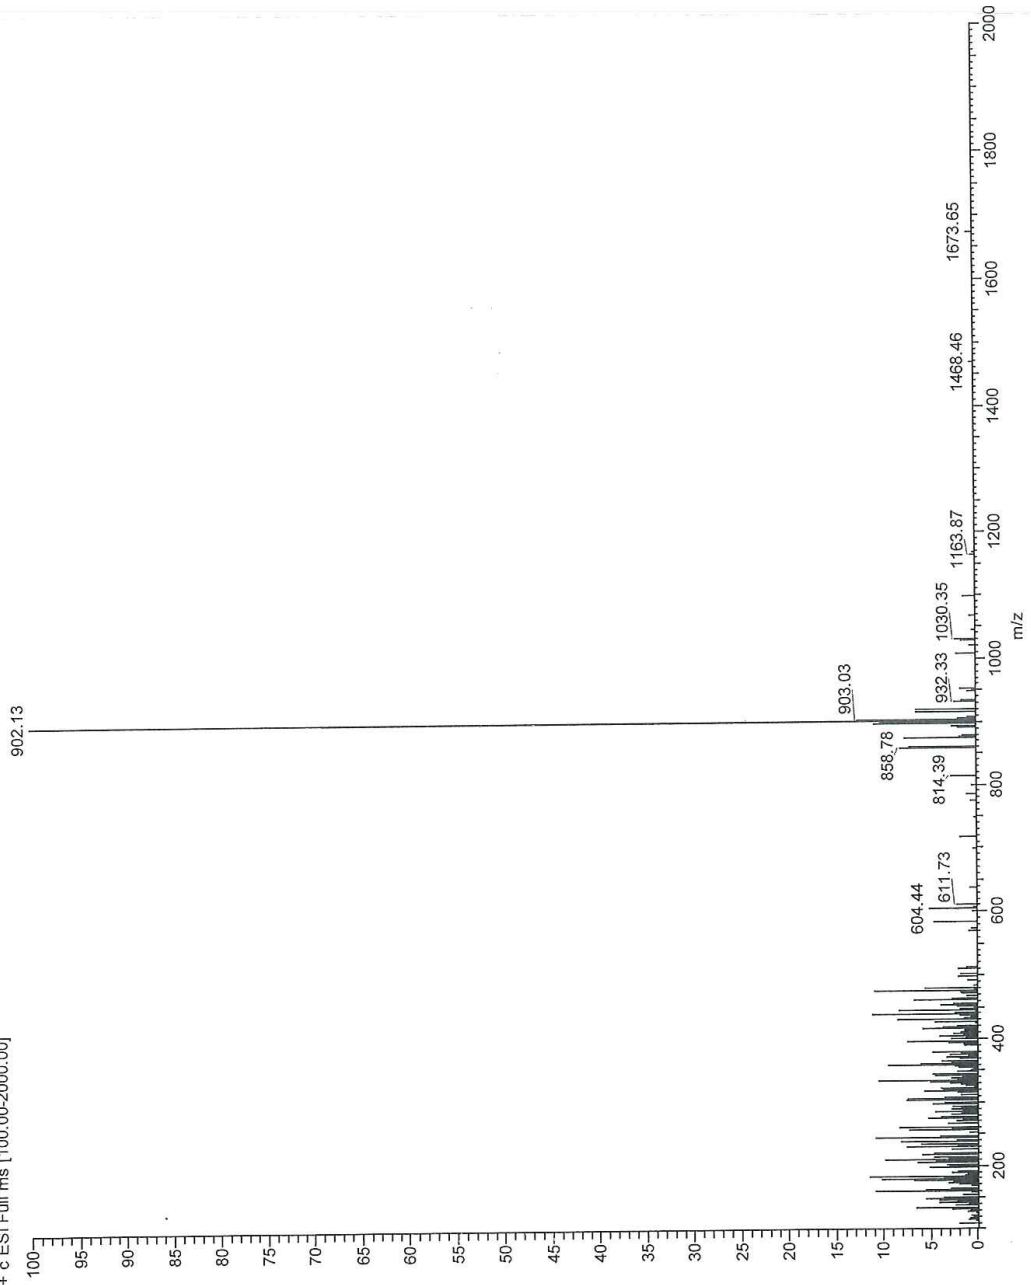

SP4

STANDARD 1H OBSERVE

exp1 stdih  
SAMPLE DEC. & VT  
date Jan 28 2008 dfrq 300.201  
solvent DMSO dn H1  
file exp 41  
ACQUISITION exp 0  
sfrq 300.201 dm nnn  
tn H1 dmm C  
at 1.898 dmf 11400  
np 17884  
sw 4500.5 wfile PROCESSING  
fb 2500 proc  
t1 57 fn not used  
t2 57  
pw 7.0 wert  
d1 1.000 wexp  
nt 32 wbs  
ct 32 wnt  
alock n  
gain 20  
il n  
in n  
dp Y  
DISPLAY  
sp -706.4  
wp 4500.5  
vs 214  
sc 0  
wc 250  
izmm 500.00  
rfi 706.4  
rfp 0  
th 20  
ins 100.000  
nm cdc ph

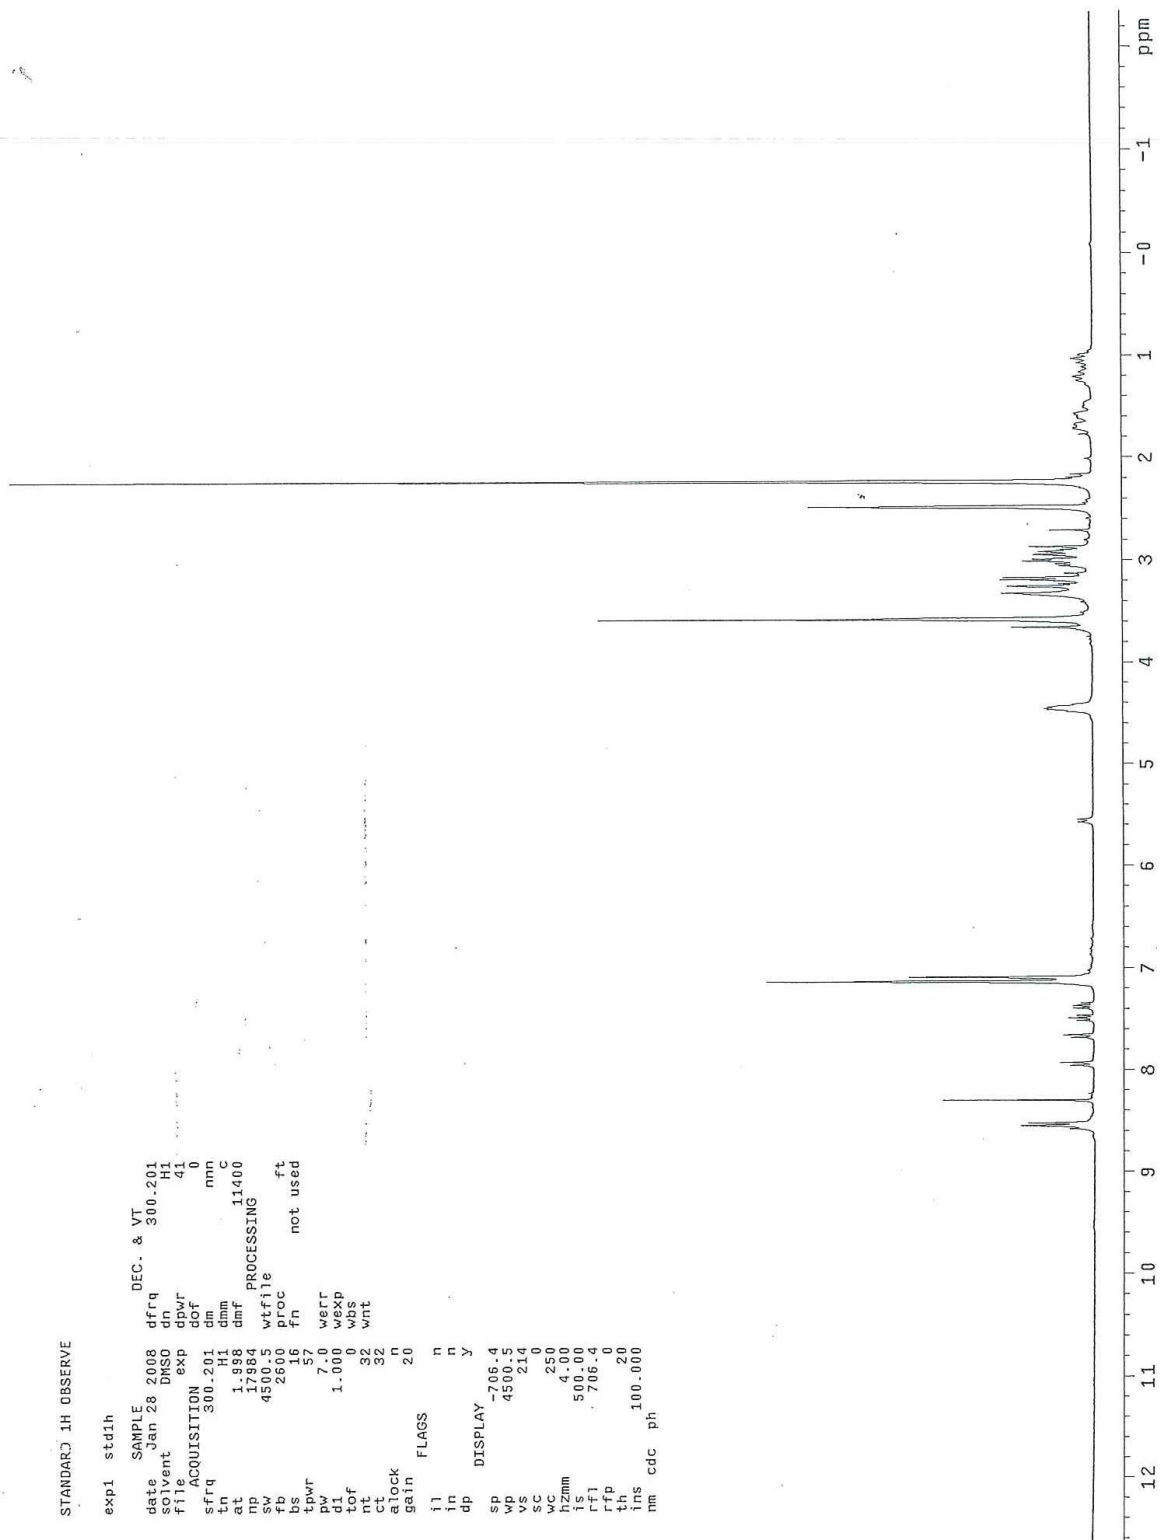

SP4

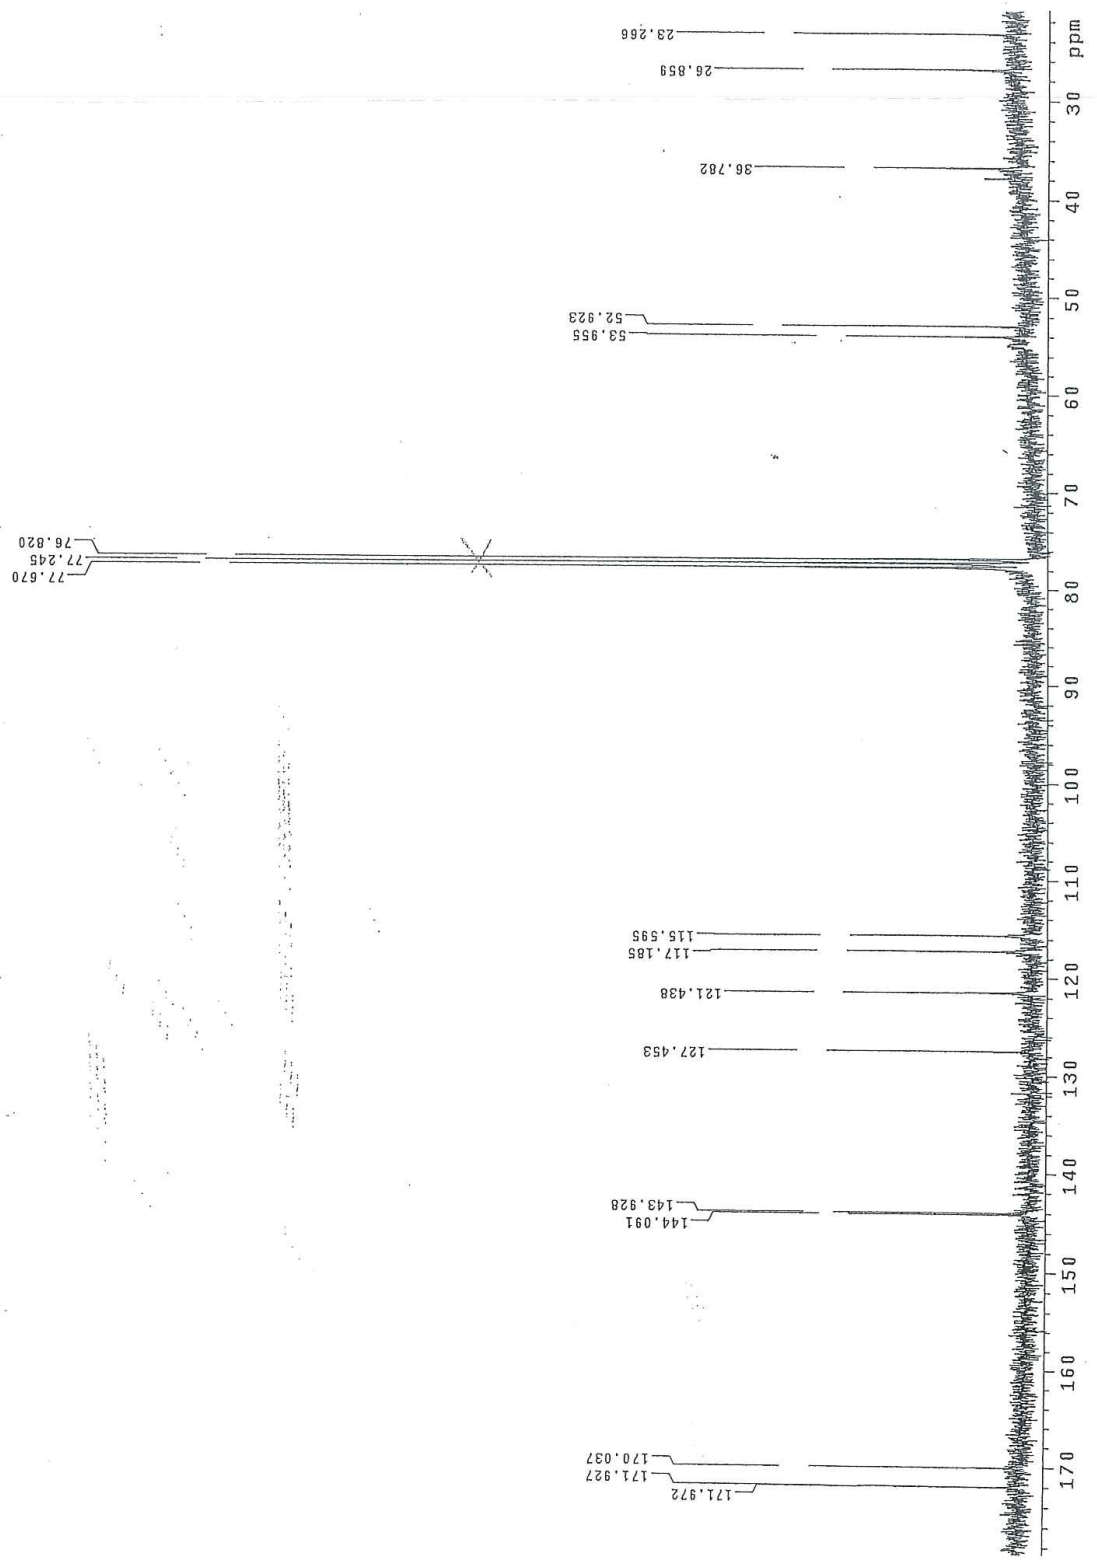

SP4 #60 RT: 1.97 AV: 1 NL: 2.28E6  
T: + c ESI Full ms [100.00-2000.00]

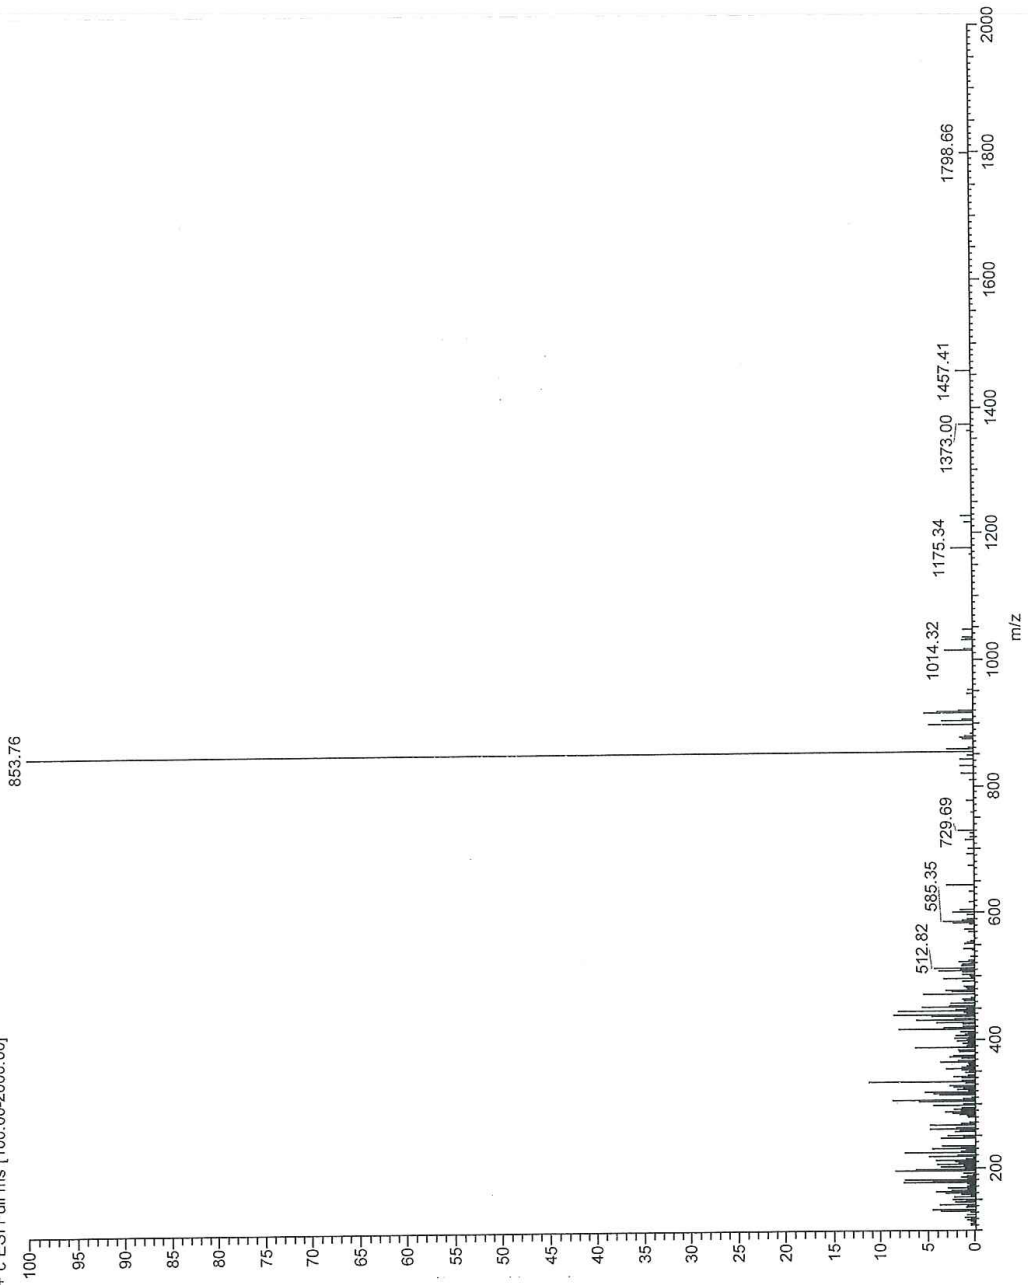

S95

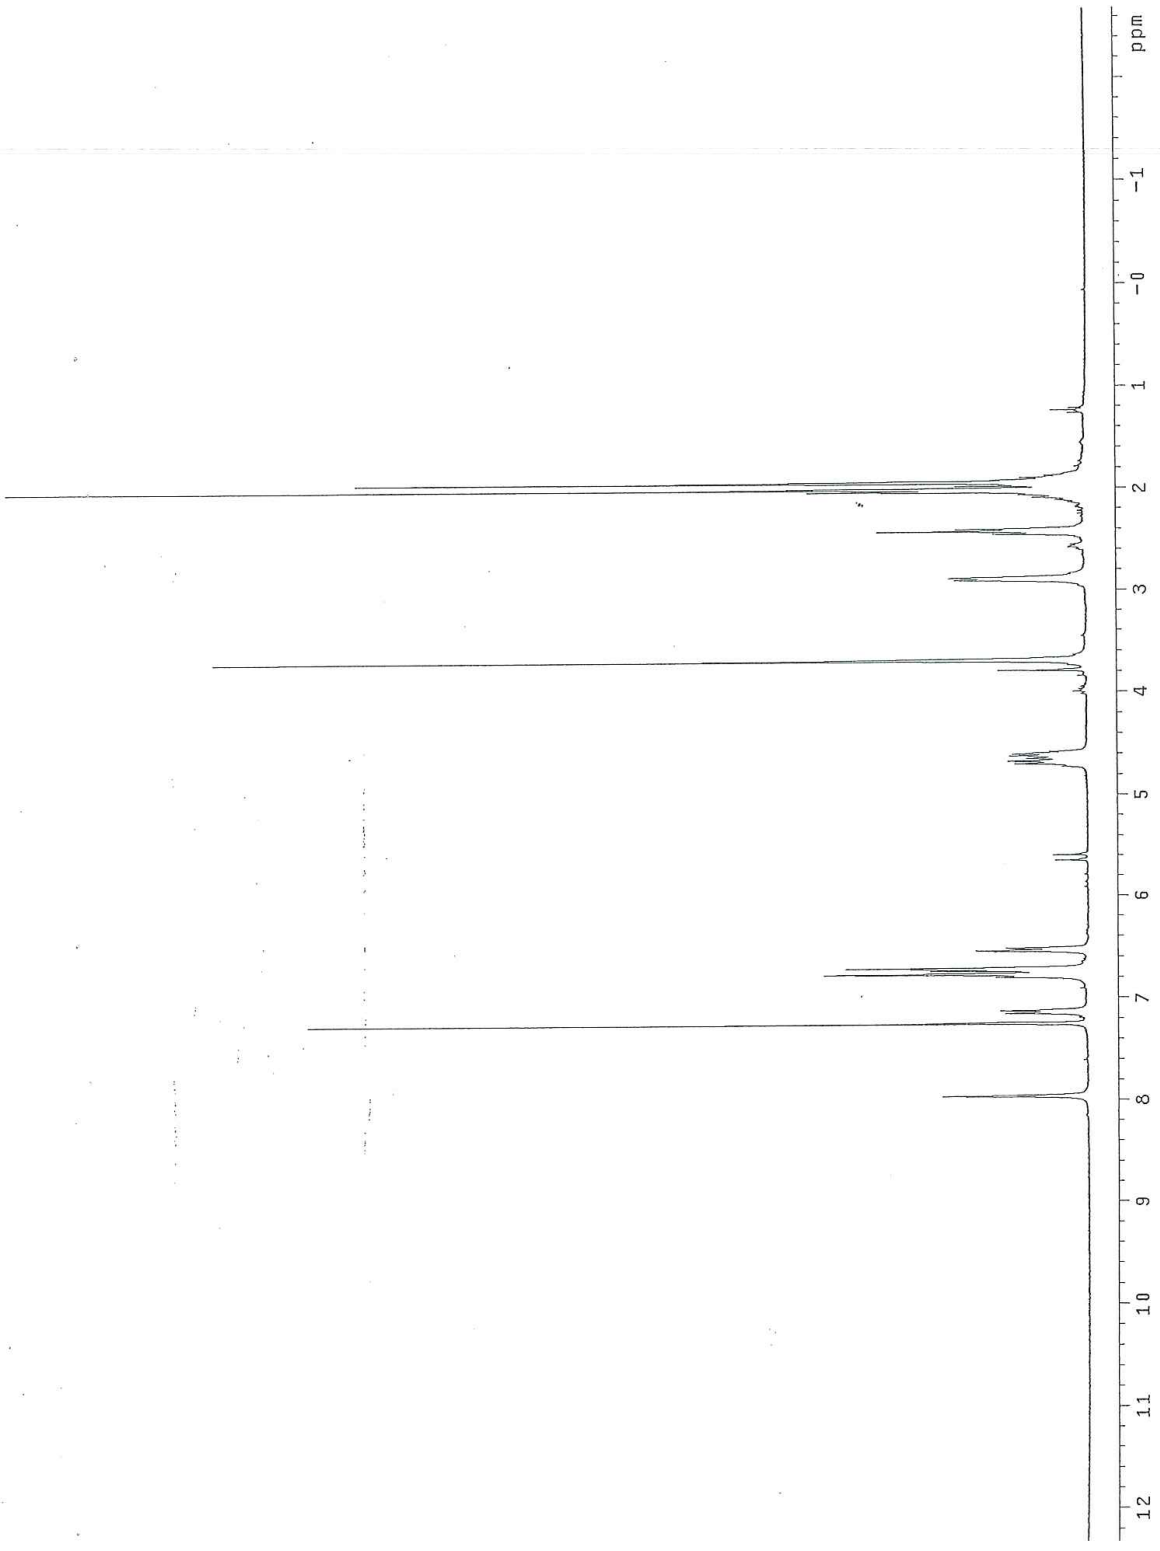

SP5

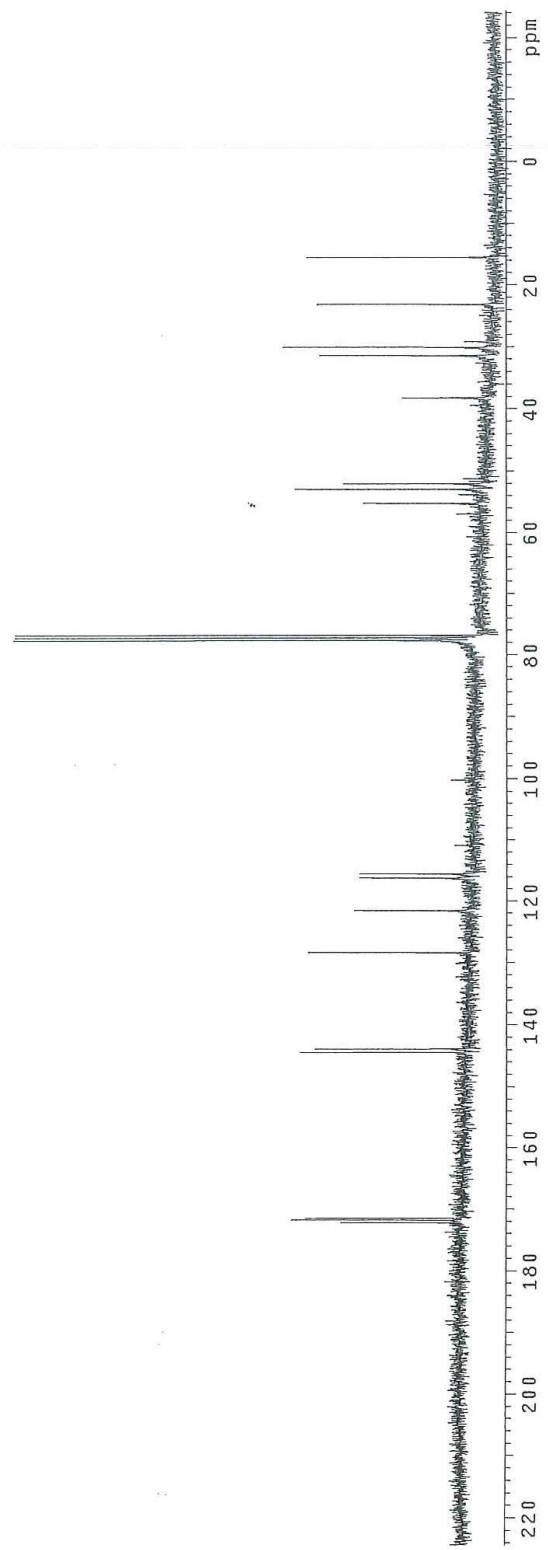

SP5 #475 RT: 10.47 AV: 1 NL: 1.71E5  
T: + c ESI Full ms [50.00-1000.00]

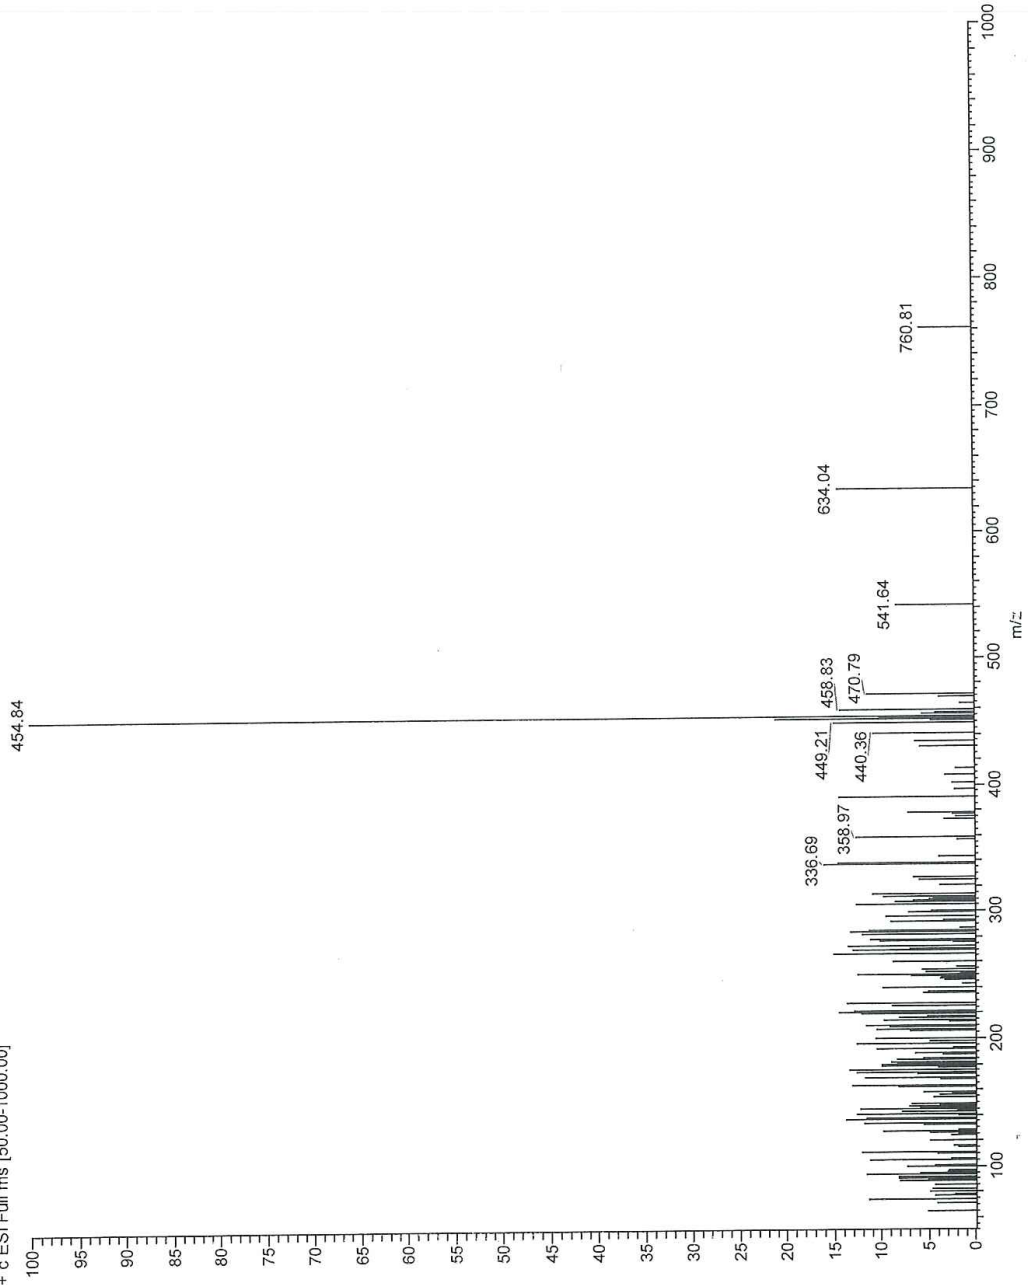



SP6

STANDAPJ 1H OBSERVE

```
exp1 std1h
SAMPLE
date may 16 2007
solvent CDCl3
F1 ACQUISITION
sfrq 300.059
at 1.998
np 17884
sw 4500.5
fb 2500
bs 19
tpwr 7.0
d1 1.000
tof 0
nt 16
ct 16
alock
gain
fl
in
in
dp
SP -804.1
WP 4500.5
VS 200
SC 95.0
WC 4.00
ic 500.00
rf1 804.1
rfp
th
ins
nm cdc ph
```

```
DEC. & VT
dfrq 300.059
dmr 41
dof 0
dm nnn
dmm nnn
dmf 11400
wf1file
proc
fn not used
werr
wexp
wbs
wnt
```

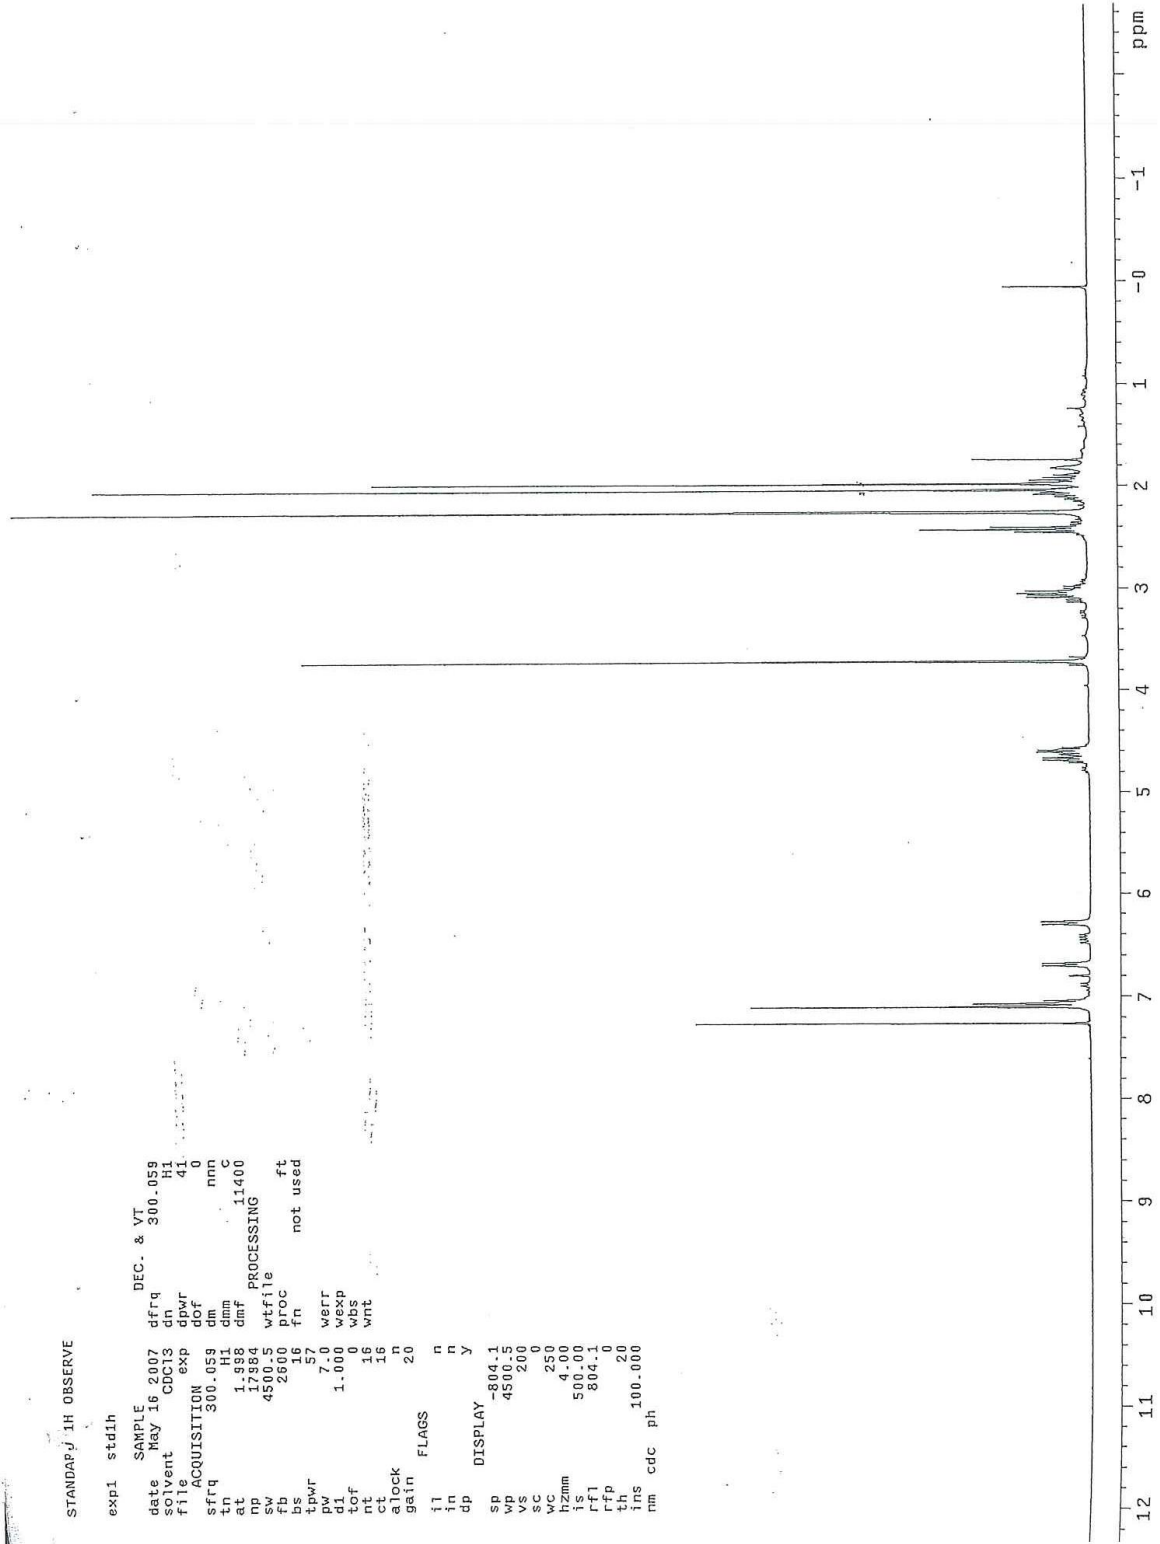

SP6

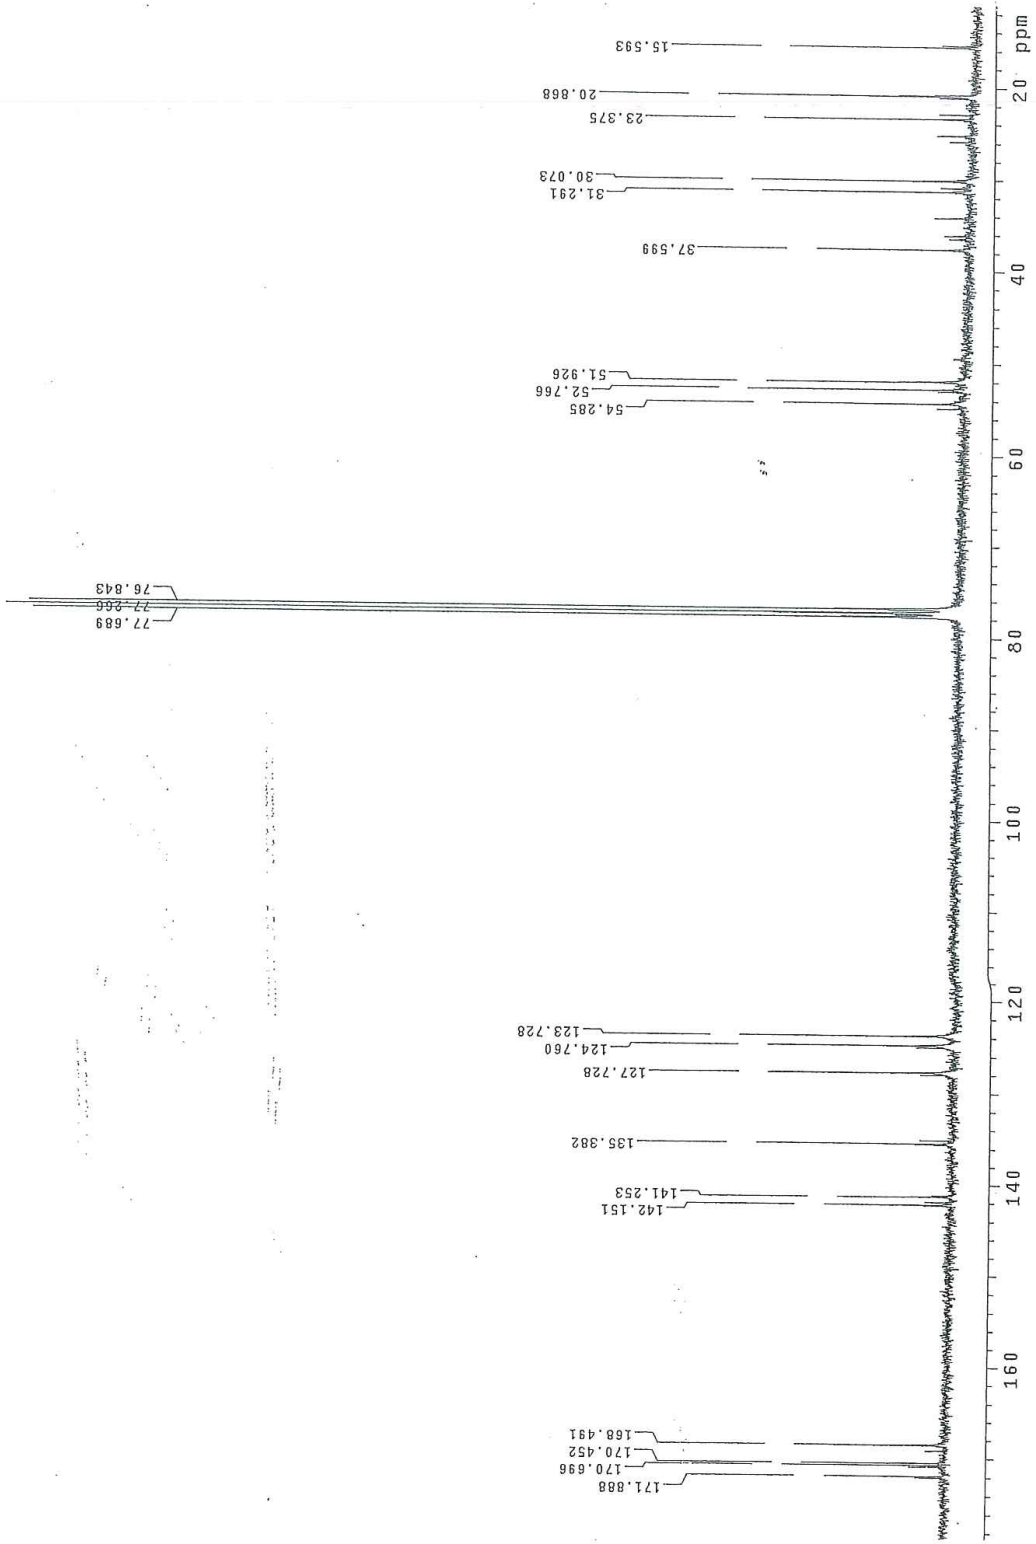

SP6 #202 RT: 4.69 AV: 1 NL: 1.28E6  
T: + c ESI Full ms [50.00-1000.00]

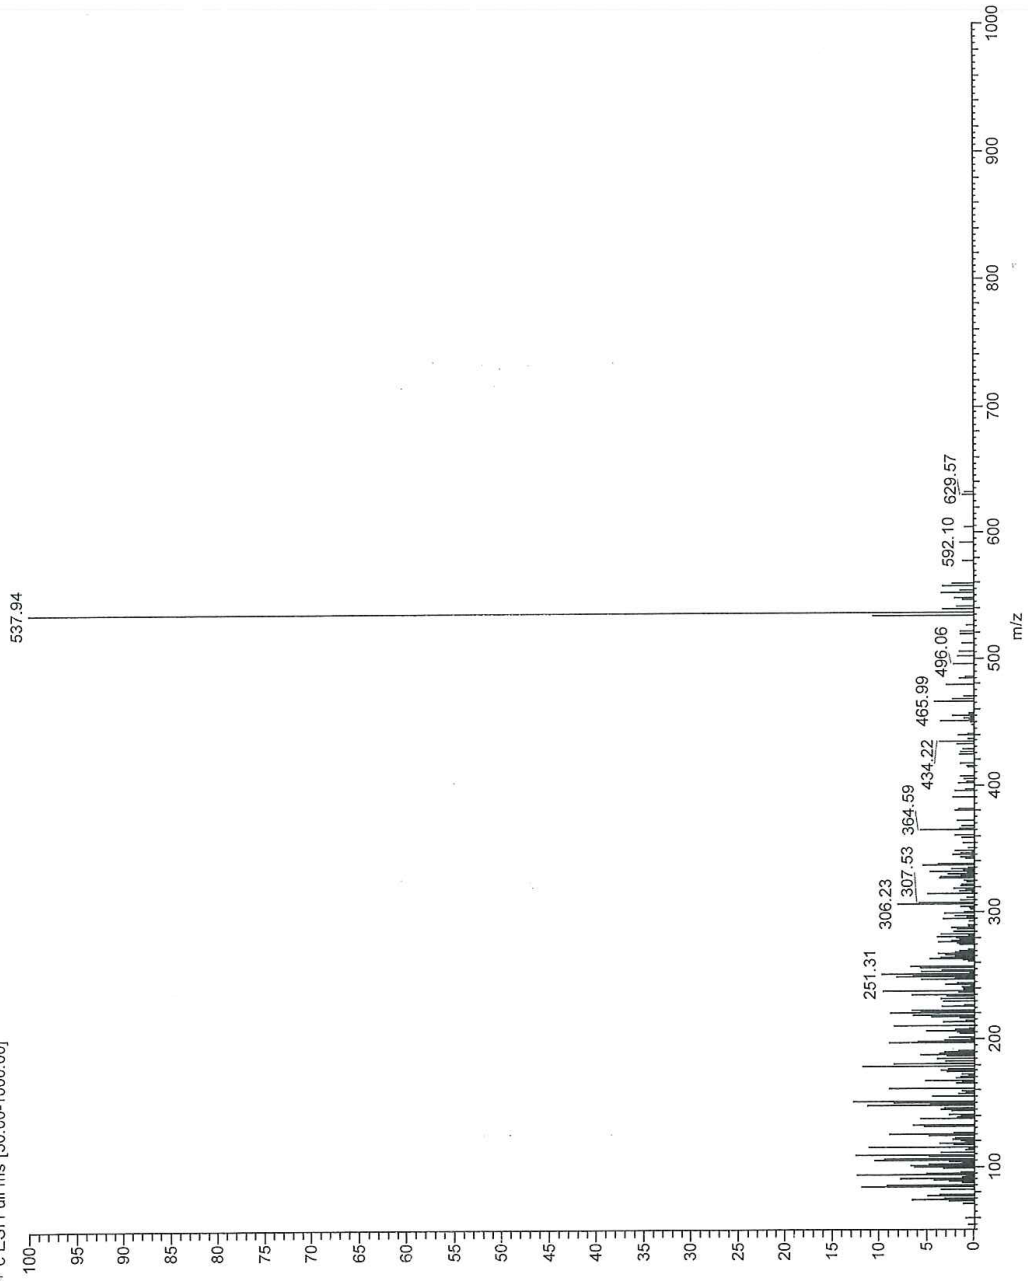

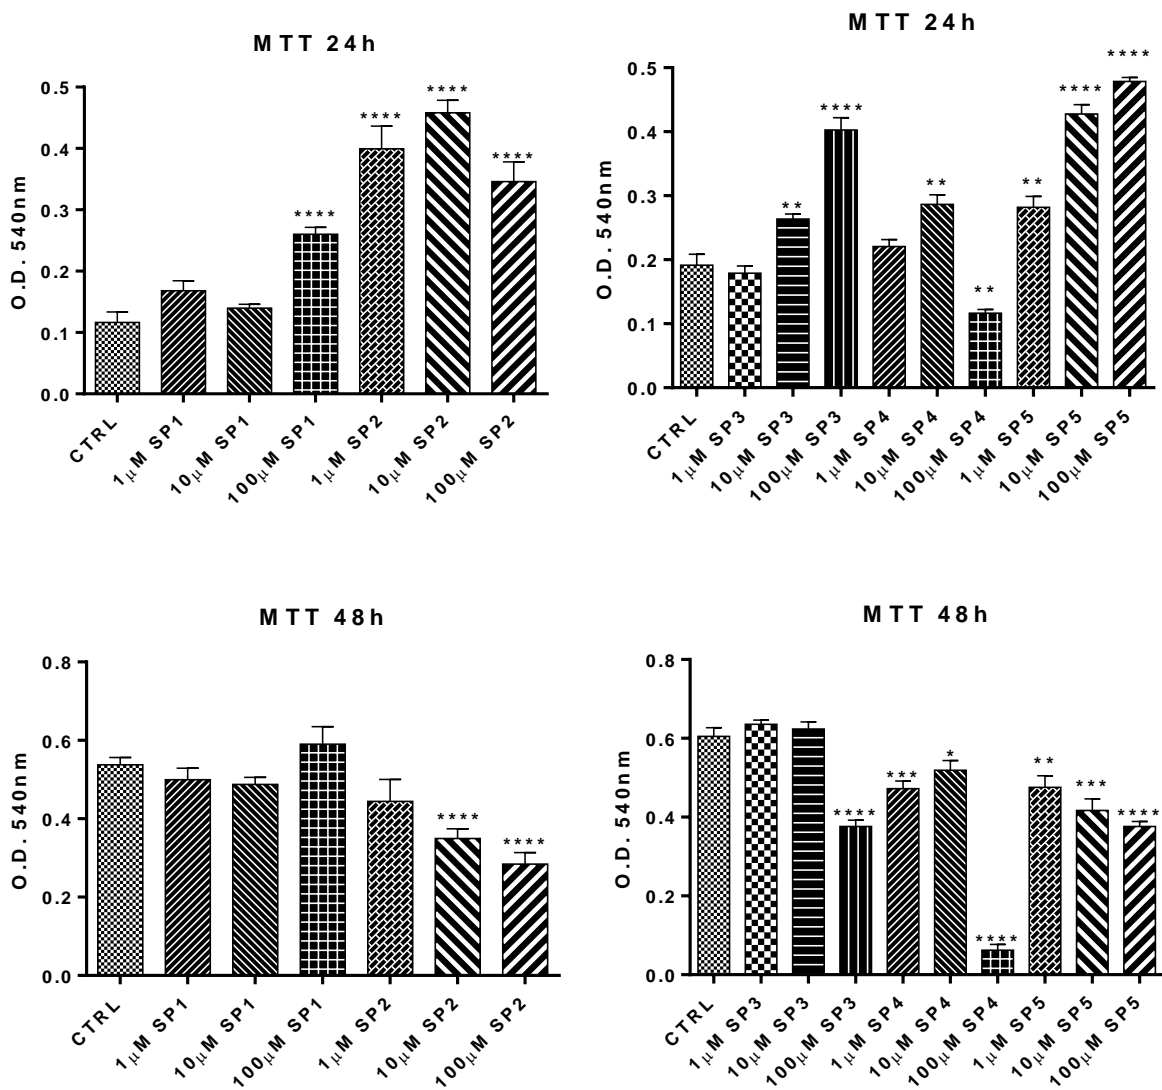

**Figure 1S.** Dose-response effects of LD and SP1-5 in undifferentiated SH-SY5Y human neuroblastoma cells. MTT reduction assay in undifferentiated SH-SY5Y human neuroblastoma cells in the presence of LD and SP1-5. The cells were incubated for 24 or 48 h with increasing concentrations (1, 10, and 100 μM) of the compounds. After this period, cell viability was quantified by measuring the MTT reduction. CTRL: control without compounds. The means ± SEM derived from three different experiments (each with n = 16; \*\*\*\*  $p < 0.0001$ , \*\*\*  $0.0001 < p < 0.0005$ , \*\*  $0.0005 < p < 0.001$ , \*  $0.001 < p < 0.05$ ; n.s.,  $p > 0.05$ ).

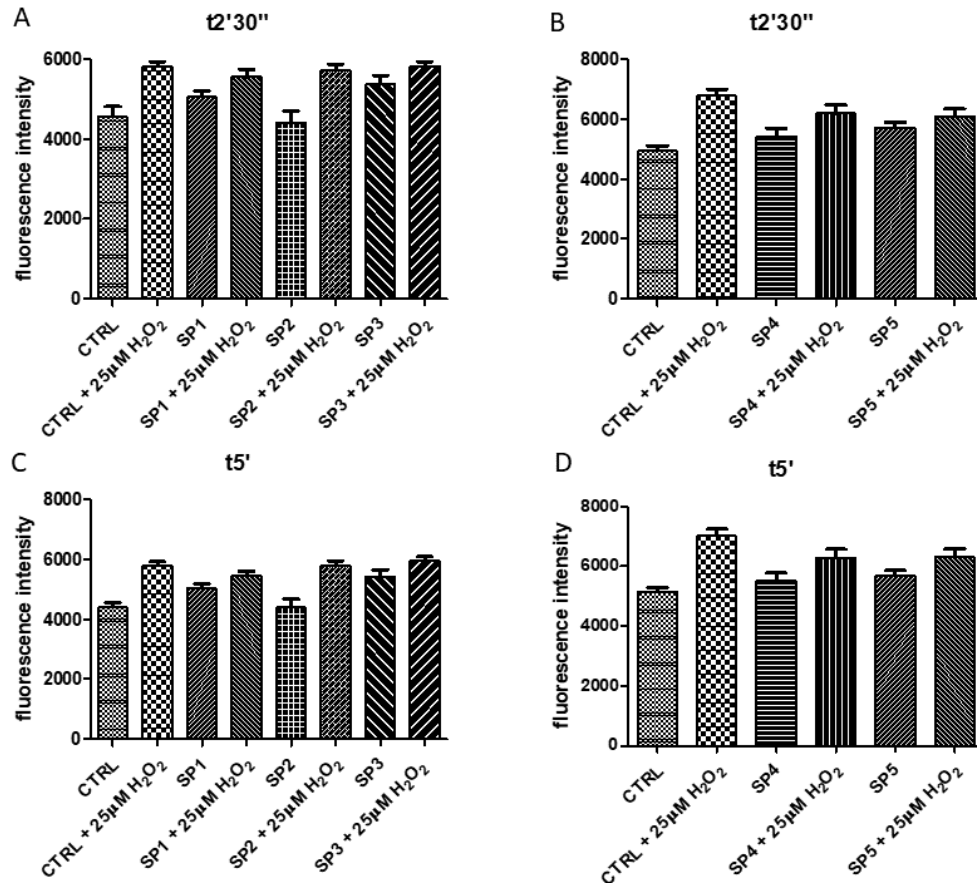

**Figure 2S.** Measurement of intracellular reactive oxygen species (ROS). The differentiated SY-SH5Y cells incubated with 1μM SP1–3 (panel A and C) or SP4–5 (panel B and D) for 24 h, were treated with 25 μM H<sub>2</sub>O<sub>2</sub> for 5 min. The fluorescence intensities are reported in this figure at two points (t'30'' and t5') during the time-course. The means ± SEM were derived from two different experiments (each with n = 8; n.s., *p* > 0.05).
